# Supplementary material
Source: PubMed Central journal article supplement (PMC2692181)
Supplement: NIHMS103389-supplement-1_si_001.pdf [file NIHMS103389-supplement-1_si_001.pdf]

# Supporting Information

## *Streptomyces erythraeus* Trypsin for Proteomics Applications

Jianying Z. Kiser<sup>†</sup>, Marc Post<sup>⊥</sup>, Benlian Wang<sup>†§</sup>, Masaru Miyagi<sup>\*,†,‡,§</sup>

<sup>†</sup>Case Center for Proteomics and Bioinformatics, <sup>‡</sup>Department of Pharmacology, <sup>§</sup>Department of Ophthalmology and Visual Sciences, Case Western Reserve University, 10900 Euclid Ave., Cleveland, OH, USA

<sup>⊥</sup>USB Research and Development, Affymetrix, Inc., 26111 Miles Rd. Cleveland, OH, USA

### **Supplemental Figures and Tables:**

Figure S-1. Synthetic His-tag-proSET gene

Figure S-2. Electrospray mass spectrum of rSET

Figure S-3. Peptides identified by LC-MS/MS

Figure S-4. Substrate concentration curves for rSET and modified porcine trypsin with Bz-Arg-pNA (A) and Bz-Lys-pNA (B)

Table S-1. Peptides analyzed

Table S-2. BSA tryptic peptides identified by rSET and modified porcine trypsin in in-solution digestion experiment

Table S-3. BSA tryptic peptides identified by rSET and modified porcine trypsin in in-gel digestion experiment

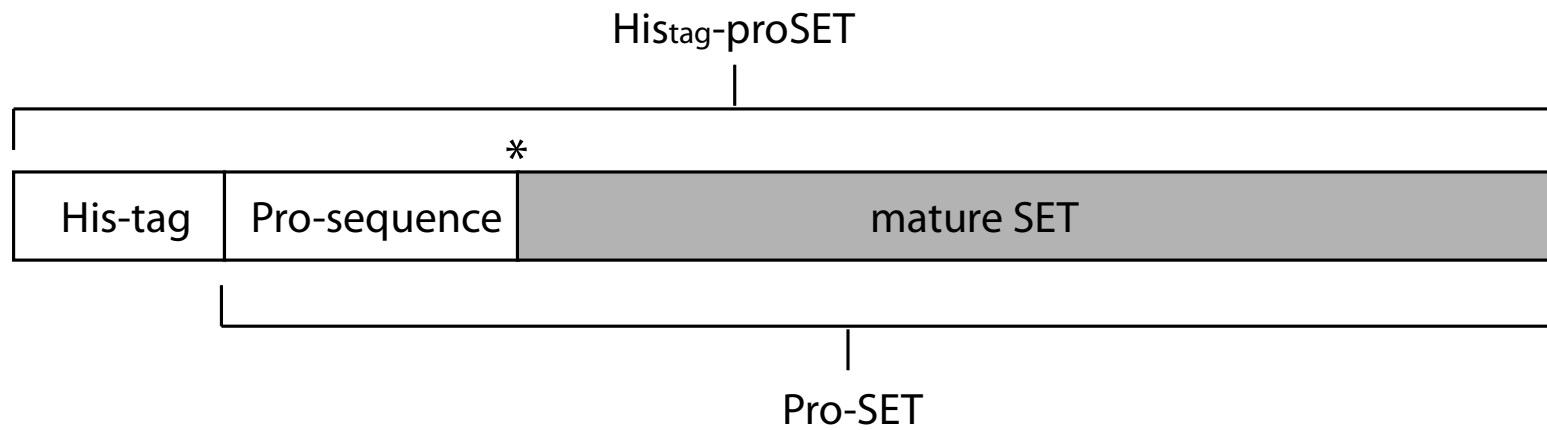

**Figure S-1.** Synthetic His-tag-proSET gene. The His tag-proSET gene consists of three distinct sequences: the His tag, the pro-peptide sequence (12 AA), and the mature SET sequence. The asterisk indicates the site for cleavage by chymotrypsin.

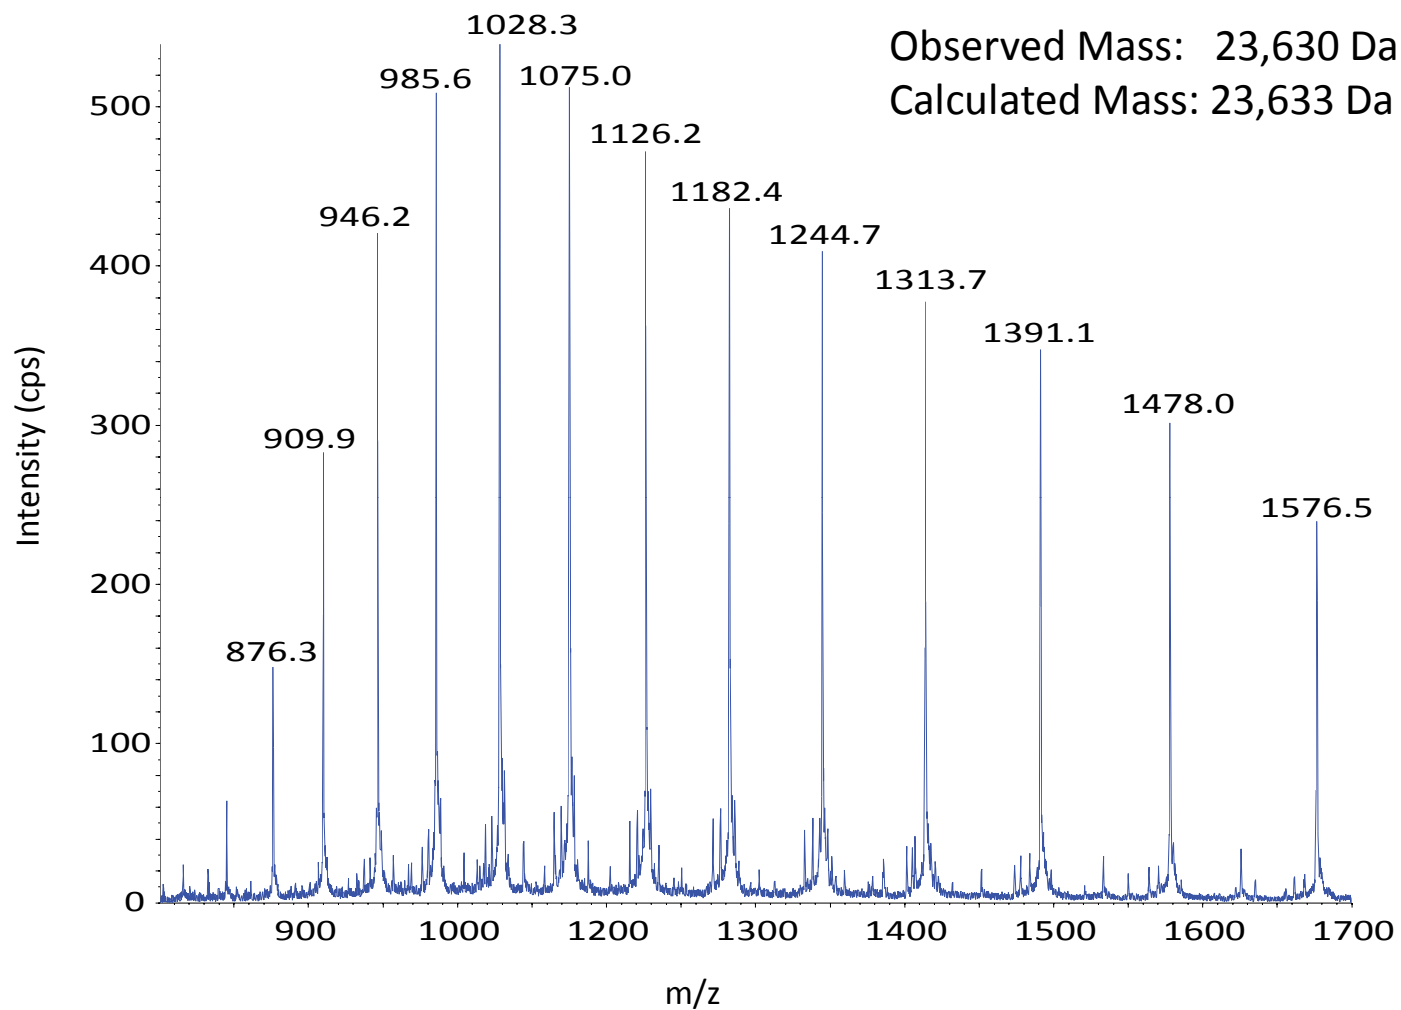

**Figure S-2.** Electrospray mass spectrum of rSET. rSET was dissolved in 0.1% formic acid/50% acetonitrile and introduced into a QStar quadrupole/time-of-flight mass spectrometer (Applied Biosystem-MDS Sciex, Foster City, CA) equipped with a nano-electrospray ion source at a flow rate of 5  $\mu$ L/min.

IVGGEDANVQ DHPFTVALVT PDGQQFCGGT LAAPNKVVTA AHCTVGSQPA DINVVSGRV MSSNEGTVSK  
 K1 DK1 DK2 K2

VTNVVHPEY QDAAKGFVVS VLTLEAPVKE APIELAKADD AGYAPDTAAT ILGWGNTSEG GQQADHLQKA  
 K3 DK3 K4 DK4 K5 DK5 DK6 K6 DK7 DK8

TVPVNSDDTC KQAYGEYTPD AMVCAGVPEG GVDTCQGDSG GPMVVNKNLI GVTSWGEGCA RPGKPGVYAR  
 K7 DK9 K8 DK10 K9

VGAYYDVLME QINAGAVSAR  
 DK11

**Figure S-3.** Peptides identified by LC-MS/MS. The observed peptides are underlines with red (Lys-C peptides) or blue (Lys-C/Asp-N peptides) lines. Lys-C peptides and Lys-C/Asp-N peptides are referred to as K and KD peptides, respectively, and numbered from the N-terminus to the C-terminus. The coverage of the rSET amino acid sequence was 95% by LC-MS/MS analysis.

Table S-1. Peptides analyzed.

| Peptide Name | Peptide Sequence                      | Position | Molecular Mass |            |
|--------------|---------------------------------------|----------|----------------|------------|
|              |                                       |          | Observed       | Calculated |
| K1           | IVGGEDANVQDHPFTVALVTPDGQQFCGGTLAAPNK  | 1-36     | 3723.76        | 3723.81    |
| K2           | VVTAAHCTVGSQPADINVVSGRTVMSSNEGTVSK    | 37-70    | 3457.64        | 3457.69    |
| K3           | VTNVVWHPEYQDAAK                       | 71-85    | 1755.82        | 1755.86    |
| K4           | GFDVSVLTLEAPVK                        | 86-99    | 1473.78        | 1473.81    |
| K5           | EAPIELAK                              | 100-107  | 869.47         | 869.49     |
| K6           | ADDAGYAPDTAATILGWGNTSEGGQQADHLQK      | 108-139  | 3257.45        | 3257.49    |
| K7           | ATVPVNSDDTCK                          | 140-151  | 1305.56        | 1305.59    |
| K8           | QAYGEYTPDAMVCAGVPEGGVDTCQGDSSGPMVVNNK | 152-188  | 3829.64        | 3829.63    |
| K9           | LIGVTSWGEGCARPGK                      | 189-204  | 1686.82        | 1686.85    |
| DK1          | DANVQDHPFTVALVTP                      | 6-21     | 1722.86        | 1722.86    |
| DK2          | DGQQFCGGTLAAPNKVVTAAHCTVGSQPA         | 22-48    | 2827.33        | 2627.34    |
| DK3          | VTNVVWHPEYQDAAK                       | 71-85    | 1755.86        | 1755.86    |
| DK4          | GFDVSVLTLEAPVK                        | 86-99    | 1473.81        | 1473.81    |
| DK5          | EAPIELAKA                             | 100-108  | 940.52         | 940.52     |
| DK6          | DDAGYAP                               | 109-115  | 707.28         | 707.28     |
| DK7          | DTAATILGWGNTSEGGQQA                   | 116-134  | 1875.87        | 1875.86    |
| DK8          | DHLQKATVPVNS                          | 135-146  | 1307.68        | 1307.68    |
| DK9          | QAYGEYTP                              | 152-159  | 927.40         | 927.40     |
| DK10         | DSGGPMVVNNK                           | 178-188  | 1116.52        | 1116.52    |
| DK11         | DVLMEQINAGAVSAR                       | 216-230  | 1572.80        | 1572.79    |

K peptides and DK peptides were analyzed by Q-star and FT-LTQ, respectively. Cystein residues were carbamidomethylated.

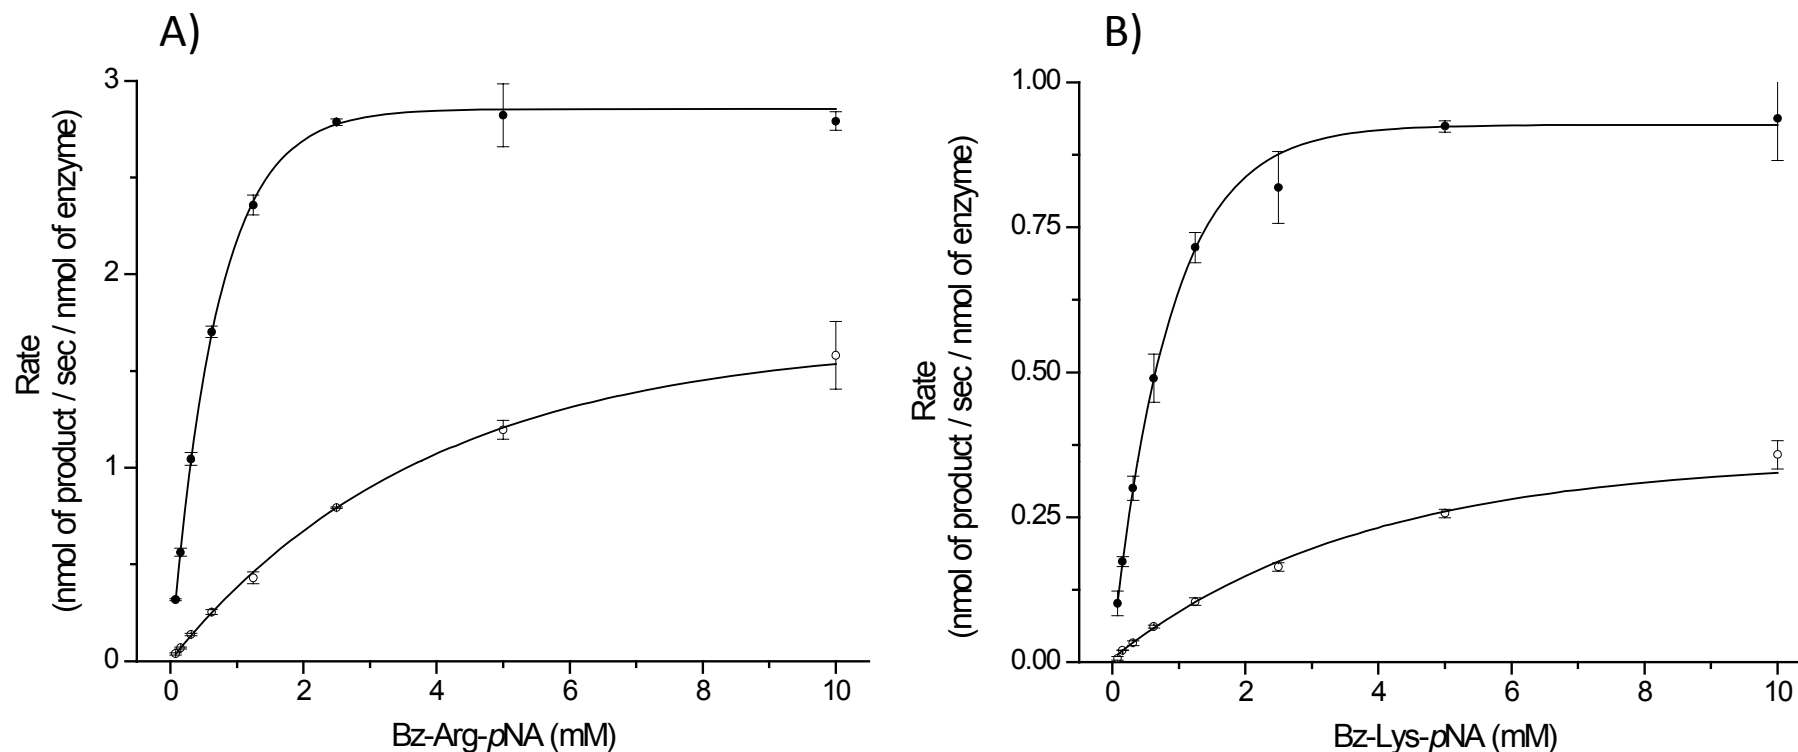

**Figure S-4.** Substrate concentration curves for rSET and modified porcine trypsin with Bz-Arg-*p*NA (A) and Bz-Lys-*p*NA (B). Various concentrations of Bz-Arg-*p*NA or Bz-Lys-*p*NA were incubated with rSET (-●-) or modified porcine trypsin (-○-) at 25 °C and pH 8.0. The *p*-nitroaniline produced was quantified by VIS-spectroscopy (405 nm). Values represent the mean ± standard deviation of triplicate reactions.

Table S-2. BSA tryptic peptides identified by rSET and modified porcine trypsin in in-solution digestion experiment. The peptides were produced by digesting BSA in solution by either rSET or modified porcine trypsin at 25 °C for 5 h.

| Peptide Sequence <sup>a</sup> | Position  | Calculated Mass | Retention Time <sup>b</sup><br>(min) | Observed Mass <sup>c</sup> |                           |
|-------------------------------|-----------|-----------------|--------------------------------------|----------------------------|---------------------------|
|                               |           |                 |                                      | In rSET digest             | In porcine trypsin digest |
| R.FKDIGEEHFK.G                | 35 - 44   | 1248.614        | 20.0                                 | 1248.617                   | 1248.617                  |
| K.DLGEHRK.G                   | 37 - 44   | 973.451         | 20.0                                 | 973.452                    | 973.452                   |
| K.LVNELTEFAK.T                | 66 - 75   | 1162.623        | 28.6                                 | 1162.623                   | 1162.622                  |
| K.LVNELTEFAKTCVADESHAGCK.S    | 66 - 88   | 2607.195        | 29.7                                 | 2607.198                   | 2607.198                  |
| K.TCVADESHAGCK.S              | 76 - 88   | 1462.582        | 14.0                                 | 1462.587                   | 1462.588                  |
| K.TCVADESHAGCK.SLHTFGDELCK.V  | 76 - 100  | 2863.258        | 26.7                                 | 2863.265                   | 2863.266                  |
| K.SLHTFGDELCK.V               | 89 - 100  | 1418.686        | 28.0                                 | 1418.688                   | 1418.689                  |
| K.VASIRETYGMADCCCK.Q          | 101 - 117 | 2003.839        | 24.0                                 | N.I.                       | 2003.842                  |
| K.LKPPNITLCEFRKADCK.K         | 139 - 155 | 2018.962        | 25.5                                 | 2018.964                   | 2018.964                  |
| K.YIYEIARR                    | 161 - 167 | 926.486         | 25.1                                 | 926.488                    | 926.488                   |
| K.YIYEIARR.H                  | 161 - 168 | 1082.587        | 22.2                                 | 1082.589                   | 1082.590                  |
| R.RHPYFAPELLYYANK.Y           | 168 - 183 | 2044.021        | 30.6                                 | 2044.025                   | 2044.026                  |
| R.HPPYFAPELLYYANK.Y           | 169 - 183 | 1887.920        | 33.0                                 | 1887.926                   | 1887.927                  |
| K.YNNGVQEQCOAEDK.G            | 184 - 197 | 1746.698        | 23.4                                 | 1746.702                   | 1746.701                  |
| K.YNNGVQEQCOAEDK.G            | 184 - 204 | 2486.103        | 28.0                                 | 2486.107                   | 2486.107                  |
| K.GACLLPKIETMR.E              | 198 - 209 | 1387.732        | 26.8                                 | 1387.735                   | N.I.                      |
| R.ALKAWSVAR.L                 | 233 - 241 | 1000.582        | 21.1                                 | N.I.                       | 1000.584                  |
| R.LSQFRPK.A                   | 242 - 248 | 846.496         | 15.8                                 | 846.500                    | 846.500                   |
| K.FPKAEFVEVTK.L               | 246 - 256 | 1293.697        | 24.8                                 | 1293.698                   | 1293.699                  |
| K.AEVEVTK.L                   | 249 - 256 | 921.481         | 21.8                                 | 921.483                    | 921.483                   |
| K.AEVEVTKLVDLTK.V             | 249 - 263 | 1691.935        | 29.2                                 | 1691.941                   | 1691.941                  |
| K.ECHGDLLCADDR.A              | 264 - 280 | 2112.878        | 18.3                                 | 2112.885                   | 2112.884                  |
| K.YICNDQDTISK.L               | 286 - 297 | 1442.635        | 19.9                                 | 1442.635                   | 1442.635                  |
| K.YICNDQDTISSK.L.E            | 286 - 299 | 1683.814        | 22.4                                 | 1683.818                   | 1683.817                  |
| K.LKECCDPLELK.S               | 298 - 309 | 1531.774        | 17.9                                 | 1531.777                   | 1531.777                  |
| K.ECCDPLELK.S                 | 300 - 309 | 1290.595        | 17.7                                 | 1290.599                   | 1290.599                  |
| K.DAFIGSELYEYSR.R             | 347 - 359 | 1566.735        | 27.7                                 | 1566.744                   | 1566.744                  |
| R.RHPEVAASVLLR.L              | 360 - 371 | 1438.805        | 24.7                                 | 1438.807                   | 1438.807                  |
| R.LAKEYEATLECCAK.D            | 372 - 386 | 1813.823        | 22.8                                 | N.I.                       | 1813.826                  |
| K.EYEATLECCAK.D               | 375 - 399 | 3037.242        | 27.0                                 | 3037.247                   | N.I.                      |
| K.DDPHACYSYTFDKL.H            | 387 - 401 | 1794.825        | 27.0                                 | N.I.                       | 1794.829                  |
| K.KHLVDEPQNIK.Q               | 400 - 412 | 1545.888        | 23.1                                 | 1545.892                   | N.I.                      |
| K.HLVDEPQNIK.Q                | 402 - 412 | 1304.709        | 24.0                                 | 1304.711                   | 1304.711                  |
| K.HLVDEPQNIKQDOFEK.L          | 402 - 420 | 2354.133        | 26.0                                 | 2354.139                   | 2354.138                  |
| K.ONCDOFEKLGVEYGFQNALVR.Y     | 413 - 433 | 2528.212        | 33.6                                 | 2528.220                   | 2528.220                  |
| K.LGVEYGFQNALVR.Y             | 421 - 433 | 1478.788        | 31.9                                 | 1478.791                   | 1478.792                  |
| R.KVPQVSPITLVEYSR.S           | 437 - 451 | 1638.931        | 25.2                                 | 1638.932                   | 1638.933                  |
| K.VPQVSPITLVEYSR.S            | 438 - 451 | 1510.836        | 27.7                                 | 1510.839                   | 1510.839                  |
| R.CCTKPESEMRPCTEDYLSILNR.L    | 460 - 482 | 2871.302        | 32.6                                 | 2871.313                   | 2871.315                  |
| R.MPCTEDYLSILNR.L             | 469 - 482 | 1723.827        | 30.7                                 | 1723.836                   | 1723.836                  |
| R.LCVLHEKTPVSEK.V             | 483 - 495 | 1538.813        | 19.4                                 | 1538.815                   | 1538.815                  |
| K.CCTESLVNR.R                 | 499 - 507 | 1137.491        | 19.2                                 | 1137.493                   | 1137.495                  |
| R.RPFGSALTDETYVPRK.A          | 508 - 523 | 1879.914        | 27.2                                 | 1879.919                   | 1879.919                  |
| R.RPFGSALTDETYVPRKAFDEK.L     | 508 - 528 | 2470.184        | 29.2                                 | 2470.195                   | 2470.189                  |
| K.APDEKLFTHADICTLPDTEK.Q      | 524 - 544 | 2497.184        | 32.2                                 | 2497.187                   | 2497.187                  |
| K.LFTFHADICTLPDTEK.Q          | 529 - 544 | 1906.914        | 30.6                                 | 1906.918                   | 1906.919                  |
| K.LFTFHADICTLPDTEKQIK.K       | 529 - 547 | 2276.151        | 29.4                                 | 2276.154                   | 2276.155                  |
| K.KQTALVELK.H                 | 548 - 557 | 1141.707        | 25.7                                 | 1141.709                   | 1141.709                  |
| K.OTALVELK.H                  | 549 - 557 | 1013.612        | 30.0                                 | 1013.614                   | 1013.614                  |
| K.ATEEQLK.T                   | 562 - 568 | 817.418         | 27.3                                 | 817.422                    | 817.422                   |
| K.TVMENFVAFVDK.C              | 569 - 580 | 1398.685        | 25.7                                 | 1398.694                   | 1398.690                  |
| K.CCAADKPKCAVAVGPK.L          | 581 - 597 | 1926.791        | 22.2                                 | 1926.796                   | 1926.796                  |
| K.EACFAVAVGPK.L               | 588 - 597 | 1106.507        | 22.5                                 | 1106.509                   | N.I.                      |
| K.LIVSQTALAA.-                | 598 - 607 | 1001.576        | 27.5                                 | 1001.578                   | 1001.578                  |

<sup>a</sup> Cysteine residues were carbamidomethylated.

<sup>b</sup> Retention times shown are from the LC-MS/MS data for rSET digest unless for peptides solely identified in modified porcine trypsin digest.

<sup>c</sup> N.I. indicates peptides that were not identified by Mascot database search with the LC-MS/MS data.

Table S-3. BSA tryptic peptides identified by rSET and modified porcine trypsin in in-gel digestion experiment. The peptides were produced by digesting BSA in gel by either rSET or modified porcine trypsin at 25 °C for 5 h.

| Peptide Sequence <sup>a</sup> | Position  | Calculated Mass | Retention Time <sup>b</sup><br>(min) | Observed Mass <sup>c</sup> |                           |
|-------------------------------|-----------|-----------------|--------------------------------------|----------------------------|---------------------------|
|                               |           |                 |                                      | in rSET digest             | in porcine trypsin digest |
| R.DTHKSEIARR.F                | 25 - 34   | 1192.590        | 21.1                                 | N.I.                       | 1192.603                  |
| R.FKDLGEHRK.G                 | 35 - 44   | 1248.610        | 17.5                                 | 1248.618                   | 1248.619                  |
| K.DLGEHRK.G                   | 37 - 44   | 973.451         | 17.2                                 | 973.454                    | N.I.                      |
| K.LVNELTEFAK.T                | 66 - 75   | 1162.620        | 25.2                                 | 1162.627                   | 1162.627                  |
| K.LVNELTEFAKTVADESHAGCEK      | 66 - 88   | 2607.195        | 26.0                                 | 2607.201                   | 2607.204                  |
| K.TCVADESHAGCEK.S             | 76 - 88   | 1462.582        | 24.5                                 | 1462.589                   | 1462.590                  |
| K.TCVADESHAGCEKSLHTLFGDELCK.V | 76 - 100  | 2863.258        | 23.4                                 | 2863.266                   | 2863.266                  |
| K.SLHTLFGDELCK.V              | 89 - 100  | 1418.690        | 24.5                                 | 1418.689                   | 1418.691                  |
| K.VASIRLETYGMADCCCK.Q         | 101 - 117 | 2019.834        | 18.1                                 | 2019.838                   | N.I.                      |
| R.LETYGMADCCCK.Q              | 106 - 117 | 1493.511        | 15.2                                 | 1493.518                   | N.I.                      |
| R.NEGLSHKDDSPDLPK.L           | 123 - 138 | 1900.863        | 19.8                                 | 1900.870                   | N.I.                      |
| K.DDSDPLK.L                   | 131 - 138 | 885.400         | 17.7                                 | 885.412                    | 885.413                   |
| K.LKPPNITLCEDEK.A             | 139 - 151 | 1575.760        | 22.8                                 | N.I.                       | 1575.763                  |
| K.LKPPNITLCEDEKADCK.K         | 139 - 155 | 2018.960        | 22.4                                 | 2018.965                   | 2018.966                  |
| K.FWGGYLVEIARR                | 157 - 167 | 1444.750        | 27.7                                 | 1444.755                   | 1444.756                  |
| K.YLYEAR.R                    | 161 - 167 | 926.490         | 22.2                                 | 926.480                    | 926.480                   |
| R.RHRYFAPELLYVANK.Y           | 168 - 183 | 2044.020        | 26.8                                 | 2044.025                   | 2044.029                  |
| K.YVNGVFOCCQAEK.G             | 184 - 197 | 1746.700        | 20.6                                 | 1746.702                   | N.I.                      |
| K.YVNGVFOCCQAEKDG.K           | 184 - 204 | 2486.103        | 24.8                                 | 2486.108                   | 2486.108                  |
| R.CASIQKRG.R.A                | 223 - 232 | 1194.582        | 16.1                                 | 1194.586                   | 1194.586                  |
| R.ALKAWSVAR.L                 | 233 - 241 | 1000.582        | 18.3                                 | N.I.                       | 1000.585                  |
| K.AWVSAR.L                    | 236 - 241 | 688.366         | 17.7                                 | 688.368                    | 688.368                   |
| R.LSQKPK.A                    | 242 - 248 | 846.496         | 14.3                                 | 846.501                    | 846.501                   |
| K.AEFVEVTK.L                  | 249 - 256 | 921.480         | 19.1                                 | 921.483                    | 921.484                   |
| K.AEFVEVTKLVDTLK.V            | 249 - 263 | 1691.935        | 30.9                                 | 1691.941                   | 1691.941                  |
| K.LVITDTK.V                   | 257 - 263 | 788.460         | 18.3                                 | 788.467                    | N.I.                      |
| K.VYHKECGDILLEGADRA           | 264 - 280 | 2112.878        | 16.1                                 | 2112.885                   | N.I.                      |
| K.ECGHDLLEGADRA               | 267 - 280 | 1748.660        | 19.4                                 | 1748.660                   | N.I.                      |
| K.ECGHDLLEGADRADLAK.Y         | 267 - 285 | 2246.935        | 21.1                                 | 2246.940                   | N.I.                      |
| K.YICDNQDITSK.L               | 286 - 297 | 1442.630        | 17.7                                 | 1442.638                   | 1442.638                  |
| K.YICDNQDITSSK.L.E            | 286 - 299 | 1683.814        | 19.1                                 | 1683.818                   | 1683.819                  |
| K.LKECCDRPLEK.S               | 298 - 309 | 1531.770        | 15.4                                 | 1531.779                   | 1531.777                  |
| K.ECCDRPLEK.S                 | 300 - 309 | 1290.595        | 15.6                                 | 1290.599                   | 1290.600                  |
| K.SHQIAEVEK.D                 | 310 - 318 | 1071.502        | 14.0                                 | 1071.507                   | 1071.507                  |
| K.SHQIAEVEKDAEPENLPTADFAEDK.D | 310 - 336 | 3008.444        | 28.1                                 | 3008.453                   | N.I.                      |
| K.DAEPENLPTADFAEDKVC.K.N      | 319 - 340 | 2457.173        | 28.4                                 | 2457.179                   | N.I.                      |
| K.INVOEAKDAHGFHLYEYSR.R       | 341 - 359 | 2300.075        | 30.9                                 | 2300.083                   | 2300.086                  |
| K.DALGSLYEYSR.R               | 347 - 359 | 1566.740        | 33.8                                 | 1566.744                   | 1566.745                  |
| R.RHPEYAVSVLLR.L              | 360 - 371 | 1438.800        | 21.6                                 | 1438.808                   | 1438.808                  |
| R.LAKHEFATIECCAK.D            | 372 - 386 | 1813.823        | 20.0                                 | 1813.829                   | 1813.829                  |
| K.EYEATIECCAKDRPHACYSYVFDK.L  | 375 - 399 | 3037.242        | 23.8                                 | 3037.250                   | N.I.                      |
| K.DDRPHACYSYVFDK.L            | 387 - 399 | 1553.650        | 21.6                                 | 1553.649                   | N.I.                      |
| K.LKHLVDEPNLIK.Q              | 400 - 412 | 1794.820        | 23.8                                 | 1794.830                   | N.I.                      |
| K.HLVDPEPNLIK.Q               | 402 - 412 | 1304.710        | 20.2                                 | 1304.712                   | N.I.                      |
| K.HLVDPEPNLIKQNGDQFEK.L       | 402 - 420 | 2354.133        | 22.8                                 | 2354.138                   | 2354.138                  |
| K.ONGDQFEKLGFGFQNALVIR.Y      | 413 - 433 | 2528.212        | 25.5                                 | 2528.220                   | 2528.221                  |
| K.LGEGFGFQNALVIR.Y            | 421 - 433 | 1478.790        | 28.1                                 | 1478.770                   | 1478.770                  |
| K.LGEGFGFQNALVIRTR.K          | 421 - 436 | 1899.000        | 27.4                                 | N.I.                       | 1899.008                  |
| R.KVPOVSTPLVEYSR.S            | 437 - 451 | 1638.930        | 22.2                                 | 1638.934                   | 1638.934                  |
| R.SLQKVVTR.C                  | 438 - 451 | 1510.836        | 24.4                                 | 1510.839                   | 1510.840                  |
| K.VGTRCCTKPEPESR.M            | 452 - 459 | 816.482         | 18.2                                 | N.I.                       | 816.486                   |
| R.CCTKPEPESR.M                | 456 - 468 | 1578.724        | 15.4                                 | N.I.                       | 1578.730                  |
| R.CCTKPEPESRIM                | 460 - 468 | 1165.490        | 17.3                                 | 1165.489                   | N.I.                      |
| R.MPCTEDYSILINR.L             | 469 - 482 | 2871.302        | 28.7                                 | 2871.312                   | 2871.315                  |
| R.LCVLHEK.T                   | 469 - 482 | 1723.827        | 33.1                                 | 1723.836                   | 1723.836                  |
| R.LCVLHEKTPYSEK.V             | 483 - 489 | 897.470         | 15.3                                 | 897.477                    | 897.479                   |
| K.CCTESLVNRR                  | 483 - 495 | 1538.813        | 17.0                                 | 1538.815                   | 1538.817                  |
| K.CCTESLVNRRPFCFSLTPDETYPK.A  | 499 - 507 | 1137.490        | 16.8                                 | 1137.494                   | 1137.494                  |
| R.RPGRFSALTPDETYPK.A          | 508 - 523 | 2999.394        | 24.9                                 | N.I.                       | 2999.401                  |
| R.RPGRFSALTPDETYPKAFDEK.L     | 508 - 528 | 1879.910        | 23.9                                 | 1879.917                   | 1879.919                  |
| K.LFTFHADICTLPDTEKQ.K         | 529 - 544 | 2470.184        | 25.6                                 | 2470.187                   | 2470.189                  |
| K.KQTALVELLK.H                | 529 - 547 | 1906.910        | 26.9                                 | 1906.918                   | 1906.922                  |
| K.KQTALVELLK.H                | 548 - 557 | 2276.151        | 25.8                                 | 2276.157                   | 2276.158                  |
| K.KQTALVELLK.H                | 549 - 557 | 1141.710        | 22.5                                 | 1141.708                   | 1141.709                  |
| K.KQTALVELLKHKPK.A            | 549 - 561 | 1013.612        | 26.4                                 | 1013.615                   | 1013.615                  |
| K.KHKPKATEEQK.T               | 558 - 568 | 1503.914        | 20.2                                 | N.I.                       | 1503.917                  |
| K.TVMENRVAVDK.C               | 569 - 580 | 1398.685        | 31.1                                 | 1398.691                   | N.I.                      |
| K.CCAADKECFAVEGPK.L           | 581 - 597 | 1926.791        | 19.6                                 | 1926.796                   | 1926.797                  |
| K.EACFVIEGPK.L                | 588 - 597 | 1106.507        | 19.9                                 | 1106.509                   | N.I.                      |
| K.LVSTQIALA.-                 | 598 - 607 | 1001.576        | 24.4                                 | 1001.578                   | 1001.579                  |

<sup>a</sup>Cysteine residues were carbamidomethylated.

<sup>b</sup>Retention times shown are from the LC-MS/MS data for rSET digest unless for peptides solely identified in modified porcine trypsin digest.

<sup>c</sup>N.I. indicates peptides that were not identified by Mascot database search with the LC-MS/MS data.
